# Supplementary material for: Quality-controlled meteorological datasets from SIGMA automatic weather stations in northwest Greenland, 2012–2020
Source: Copernicus journal article supplement (doi:10.5194/essd-2023-116), 2023-04-28
Supplement: Supplementary file 1 [file essd-2023-116-supplement.pdf]

1 **Supplementary materials**

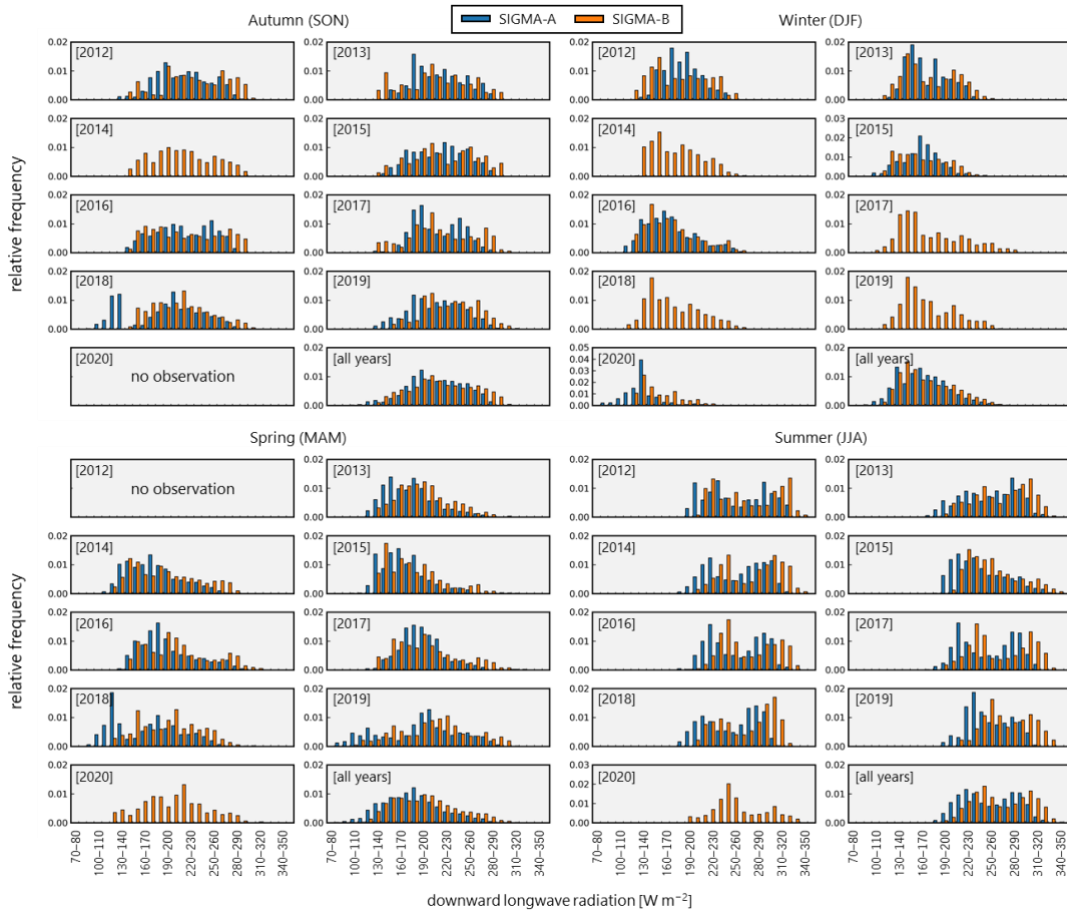

2

3 Figure S1. Histograms of downward longwave radiation ( $LW_d$ ) in each season and year at the SIGMA-  
 4 A (blue) and SIGMA-B (orange) sites. If more than half of the observation data were masked, the data  
 5 were not plotted.

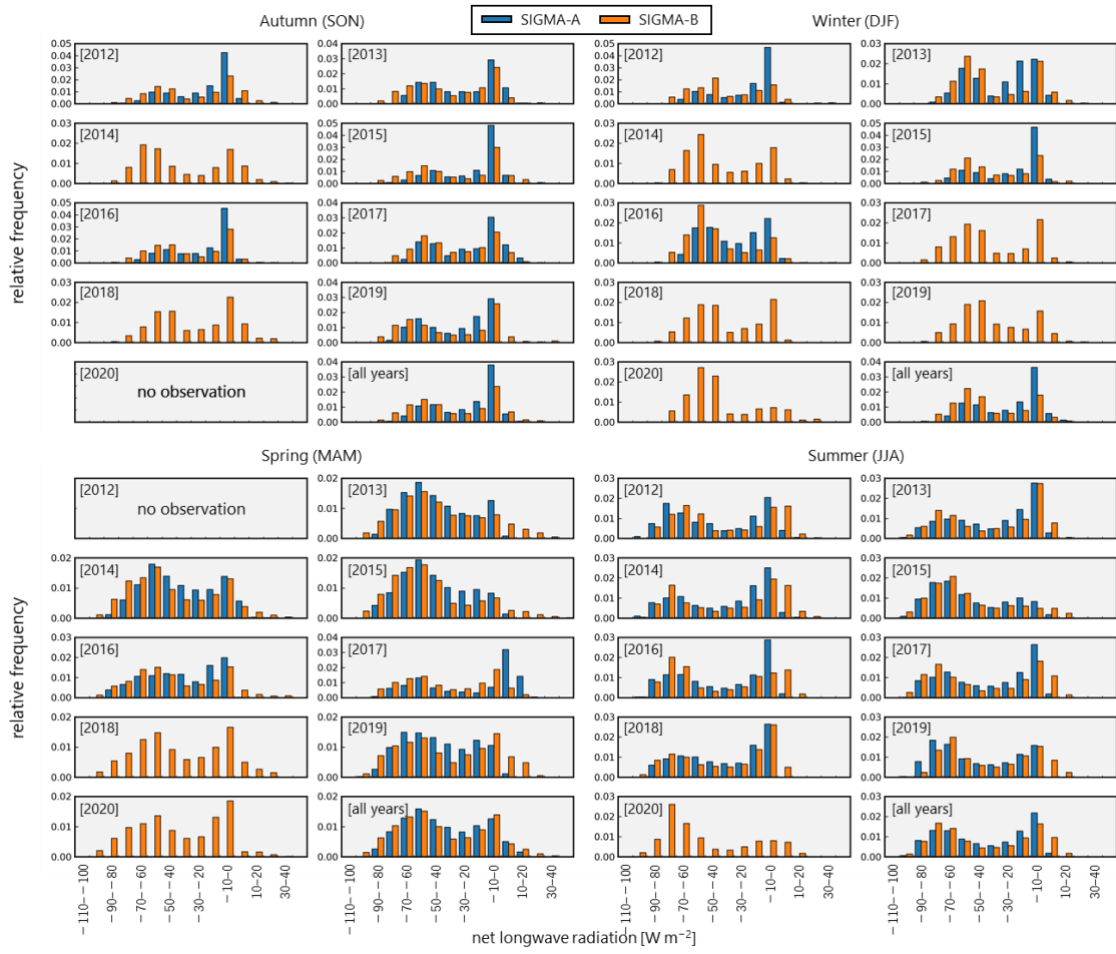

6  
 7 Figure S2. Histograms of net longwave radiation ( $LW_{net}$ ) in each season and year at the SIGMA-A  
 8 (blue) and SIGMA-B (orange) sites.
