# Supplementary material for: Quality-controlled meteorological datasets from SIGMA automatic weather stations in northwest Greenland, 2012–2020
Source: Copernicus journal article supplement (doi:10.5194/essd-2023-116), 2023-04-28
Supplement: Supplementary file [file essd-2023-116-AC2-supplement.pdf]

## Response to Reviewer's comments (RC#1)

A response to the reviewer's comments is provided below. Reviewer comments are in black gothic type, and responses are in blue type.

11 May 2023

Referee Comment #1

Citation: <https://doi.org/10.5194/essd-2023-116-RC1>

This article is appropriate to support the publication of this data set. I was able to download the data and plot samples. I felt the accompanying metadata files and the readme files did a nice job in explaining the dataset. I felt this submission was of high quality and I would trust the dataset as useful.

Thank you for your comment. We appreciate your evaluation. We hope that this dataset will be published and will contribute to many studies.
